# Supplementary material for: High-Throughput Sequencing Indicates Novel Varicosavirus, Emaravirus, and Deltapartitivirus Infections in Vitis coignetiae
Source: MDPI journal article supplement (doi:10.3390/v13050827), 2021-05-03
Supplement: s1 [file s1]

# Supplementary Materials

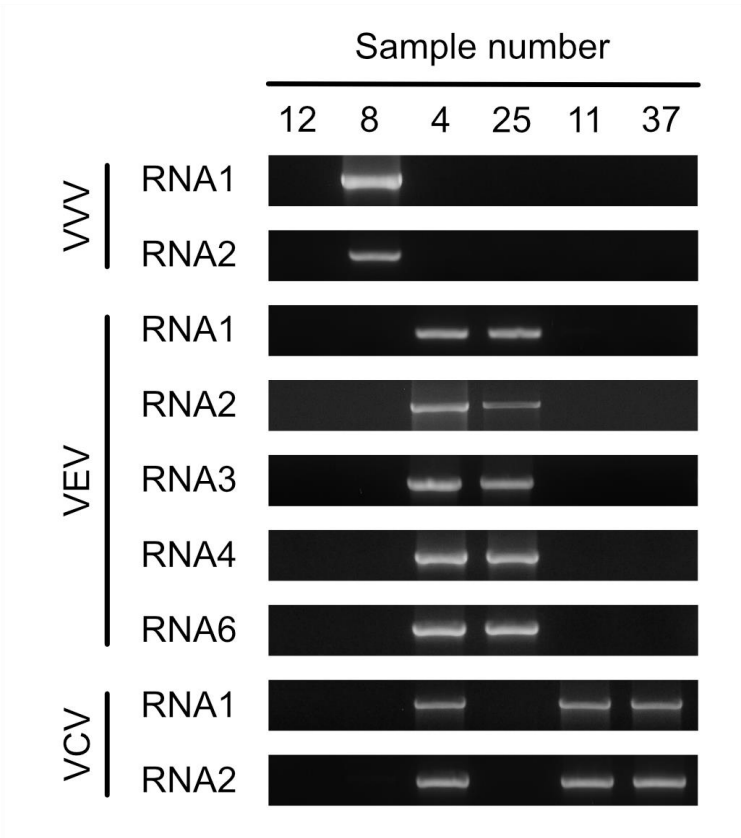

**Figure S1.** Analysis of viral infections in *Vitis coignetiae*. Total RNA extracted from samples 12, 8, 4, 25, 11, and 37 was analyzed using RT-PCR with primers listed in Table S1. VVV: Vitis varicosavirus, VEV: Vitis emaravirus, VCV: Vitis crypticvirus.

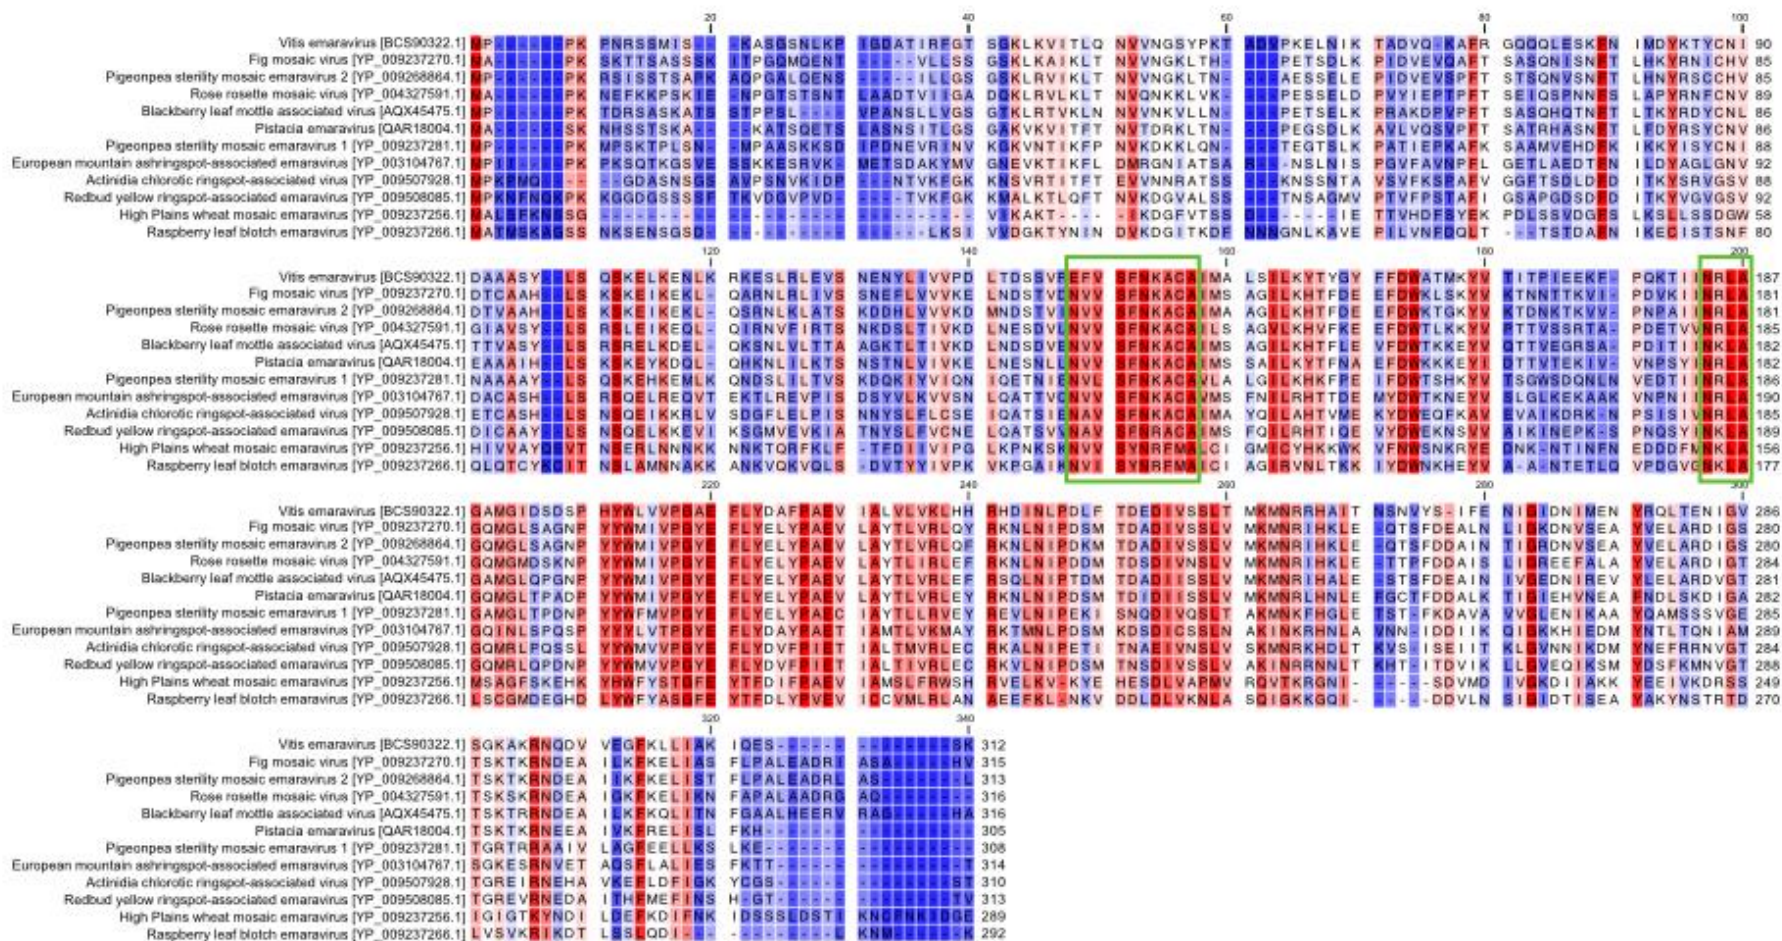

**Figure S2.** Alignment of coat protein amino-acid sequence among *Vitis emaravirus* and other approved Emaravirus. Alignment was performed using the CLC Genomic Workbench software (ver. 8.5.1; Qiagen). Background colors red and blue indicate high and low conservation among applied sequences, respectively. Green frames alternatively indicate EFVSFNKA and NXLA conserved motifs.

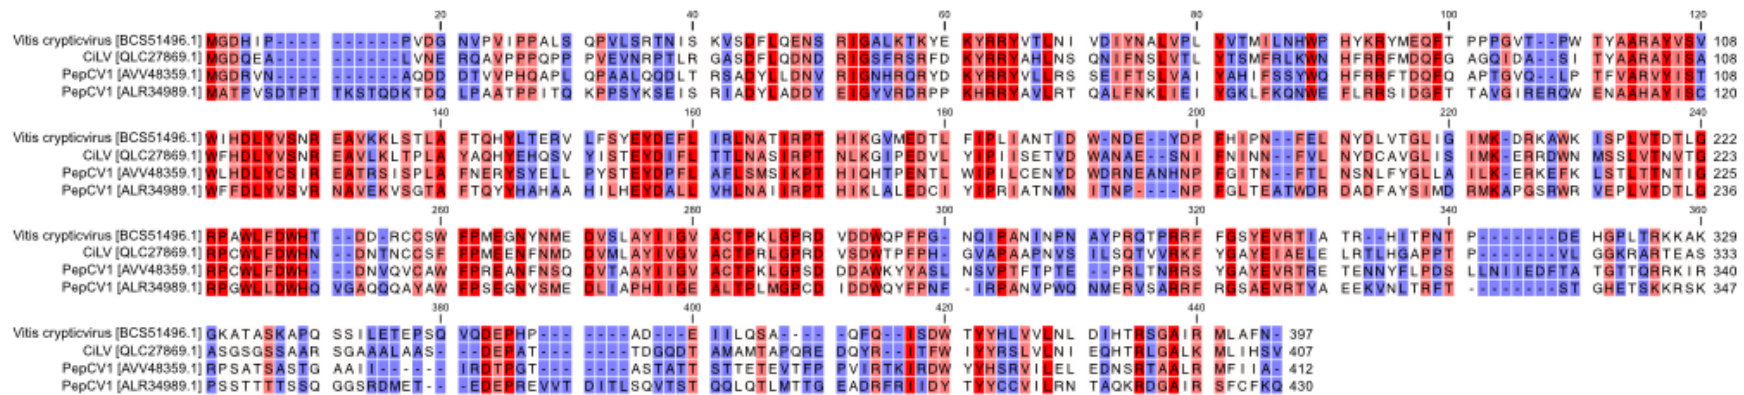

**Figure S3.** Alignment of the coat protein amino-acid sequence among *Vitis crypticivirus* and other *Partitiviridae*. Alignment was performed using CLC Genomic Workbench software (ver. 8.5.1; Qiagen). Background colors red and blue indicate high and low conservation among applied sequences, respectively.



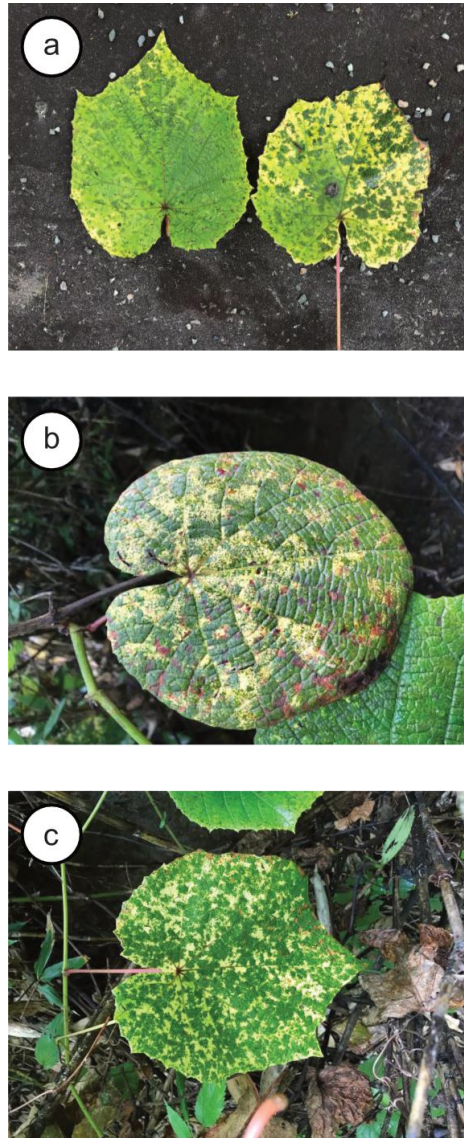

**Figure S4.** Some *Vitis coignetiae* samples used in this study showed viral-like mosaic symptoms. (a) Sample 1 infected by *Vitis varicosavirus* (VVV), grapevine Pinot gris virus (GPGV), and grapevine berry inner necrosis virus (GINV) had mosaic symptoms. (b) Sample 7 infected by GPGV and GINV also had mosaic symptoms. (c) Sample 8 infected by VVV, GPGV, and GINV also had mosaic symptoms.

**Table S1. Primer sequences used in this study.**

| Name of primer | Sequence (5'-3')          | Target                   |
|----------------|---------------------------|--------------------------|
| VVV_RdRp_F1    | CAGGCATCTAGACAGAACTC      | Vitis varicosavirus RNA1 |
| VVV_RdRp_R1    | TCTTAACGGTTAGCAGCTTT      |                          |
| VVV_Cpfull_F1  | GCGAGAGCAAAAACTCAGAA      | Vitis varicosavirus RNA2 |
| VVV_Cpfull_R1  | CGAACTGTGAATGTATATGTAGT   |                          |
| VEV_RdRp_F1    | ATGGACTTTGCTGGAACAATA     | Vitis emaravirus RNA1    |
| VEV_RdRp_R1    | CATTGTATGTGTATGTTTTCTTCA  |                          |
| VEV_RNA2_F1    | ACTCCTCAAATCAATCTATTCTTGA | Vitis emaravirus RNA2    |
| VEV_RNA2_R1    | GTTCTCCTCAAATATACCAACGA   |                          |
| VEV_RNA3_F2    | CTTTCAGAAAATTTAACATCTYTTA | Vitis emaravirus RNA3    |
| VEV_RNA3_R2    | CCTATRTTCTCAAAGATAGARTGC  |                          |

|                |                          |                                               |
|----------------|--------------------------|-----------------------------------------------|
| VEV_RNA4_F1    | TACTATGAAGAAAGTGAAAGCTGA | Vitis emaravirus RNA4                         |
| VEV_RNA4_R1    | AAGGATTAATCTGATGGTCCTA   |                                               |
| VEV_RNA6_F1    | TTGATATTTGGTCATGGCATT    | Vitis emaravirus RNA6                         |
| VEV_RNA6_R1    | AGCAAACCTAAGCACATAAAT    |                                               |
| VCV_RNA1_F1    | TTTTCACACTACGACTGTAT     | Vitis crypticvirus RNA1                       |
| VCV_RNA1_R1    | AATGTGCCCTCTCAAGCATCT    |                                               |
| partV_RNA2_F1  | TACCGTTTAAGATGGGTGAT     | Vitis crypticvirus RNA2                       |
| partV_RNA2_F1  | GTGACTAATGGAGAGATTTTC    |                                               |
| GINV_RdRp_F2   | ATGTCGGTCTTGATATTTTCT    | grapevine berry inner berry<br>necrotic virus |
| GINV_RdRp_R2   | AACCATCCAATCACGAATTA     |                                               |
| GPGV_CPfull_F1 | ATCTGGCTGTGCTGAAAATA     | grapevine Pinot gris virus                    |
| GPGV_CPfull_R1 | ACTACATACTAAATGCACTCTCC  |                                               |

---
